# Supplementary material for: Facile embedding of single vanadium atoms at the anatase TiO2(101) surface
Source: Royal Society of Chemistry journal article supplement (doi:10.1039/c6cp06965g), 2017-01-01
Supplement: c6cp06965g1.pdf [file c6cp06965g1.pdf]

# Facile embedding of single vanadium atoms at the anatase TiO<sub>2</sub>(101) surface

## Supporting Information

*Stig Koust,<sup>a</sup> Logi Arnarson,<sup>a,b</sup> Poul G. Moses,<sup>b</sup> Zheshen Li,<sup>a</sup> Igor Beinik,<sup>a</sup>  
Jeppe V. Lauritsen,<sup>a</sup> and Stefan Wendt<sup>a\*</sup>*

<sup>a</sup>Interdisciplinary Nanoscience Center (iNANO) and Department of Physics and Astronomy,  
Aarhus University, DK-8000 Aarhus C, Denmark

<sup>b</sup>Haldor Topsøe A/S, Haldor Topsøes Allé 1, DK-2800 Kongens Lyngby, Denmark

\***e-mail:** [swendt@phys.au.dk](mailto:swendt@phys.au.dk)

**Synchrotron-based XPS data, Bader charge analysis addressing the oxidation state of adsorbed  
and embedded V, and STM simulations of various structures with embedded V:**

The XPS data were collected at the ASTRID 2 synchrotron facility in Aarhus (MatLine).<sup>1</sup> Instead of two preparations as done in the main article, the measurements at the MatLine were conducted on a V / a-TiO<sub>2</sub>(101) sample prepared by V deposition at 105 K [curve (a) in Figure S1], followed by annealing at RT for 5 min [curve (b) in Figure S1]. Compared to the STM and XPS data presented in the main article the V coverage was higher (~0.3 ML instead of ~0.1 ML). In the XPS experiment at the MatLine, we again found that the V2p<sub>3/2</sub> peak shifts toward higher BE upon temperature raise. This clear shift by ~1.9 eV is even higher than the one found for low V coverage that is discussed in the main article. The reason for this large shift probably lays in the clustering of V on the a-TiO<sub>2</sub>(101) surface upon deposition of ~0.3 ML V at LT.

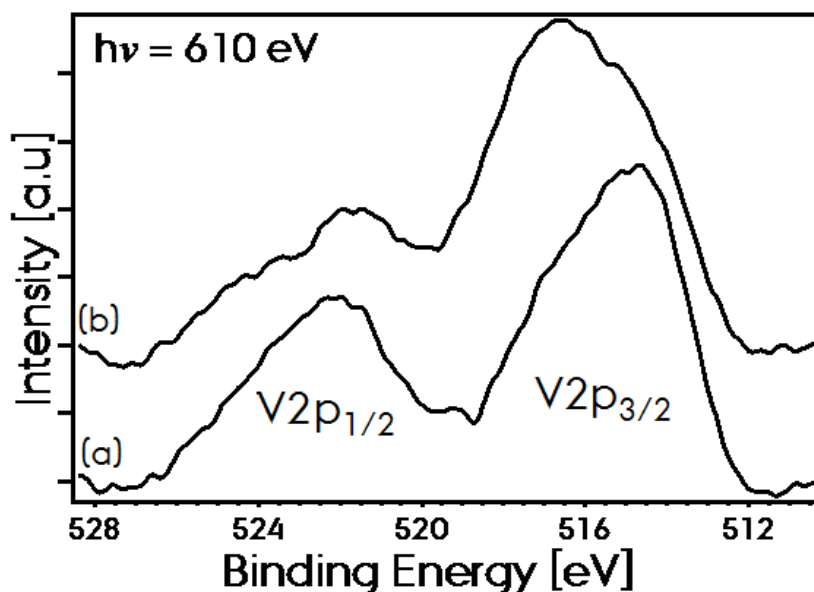

**Figure S1.** XP-V2p spectra acquired following preparations similar to that applied in the STM experiments of figure 2. Spectrum (a) was acquired following ~0.3 ML V deposition onto a-TiO<sub>2</sub>(101) at 105 K, and spectrum (b) was acquired after subsequent annealing of the sample at RT for 5 min. Spectra were acquired at 105 K and offset for clarity. The energy scale in BE was set using O1s peak positions and by referencing to the Au 4f<sub>7/2</sub> core line at 84.0 eV.

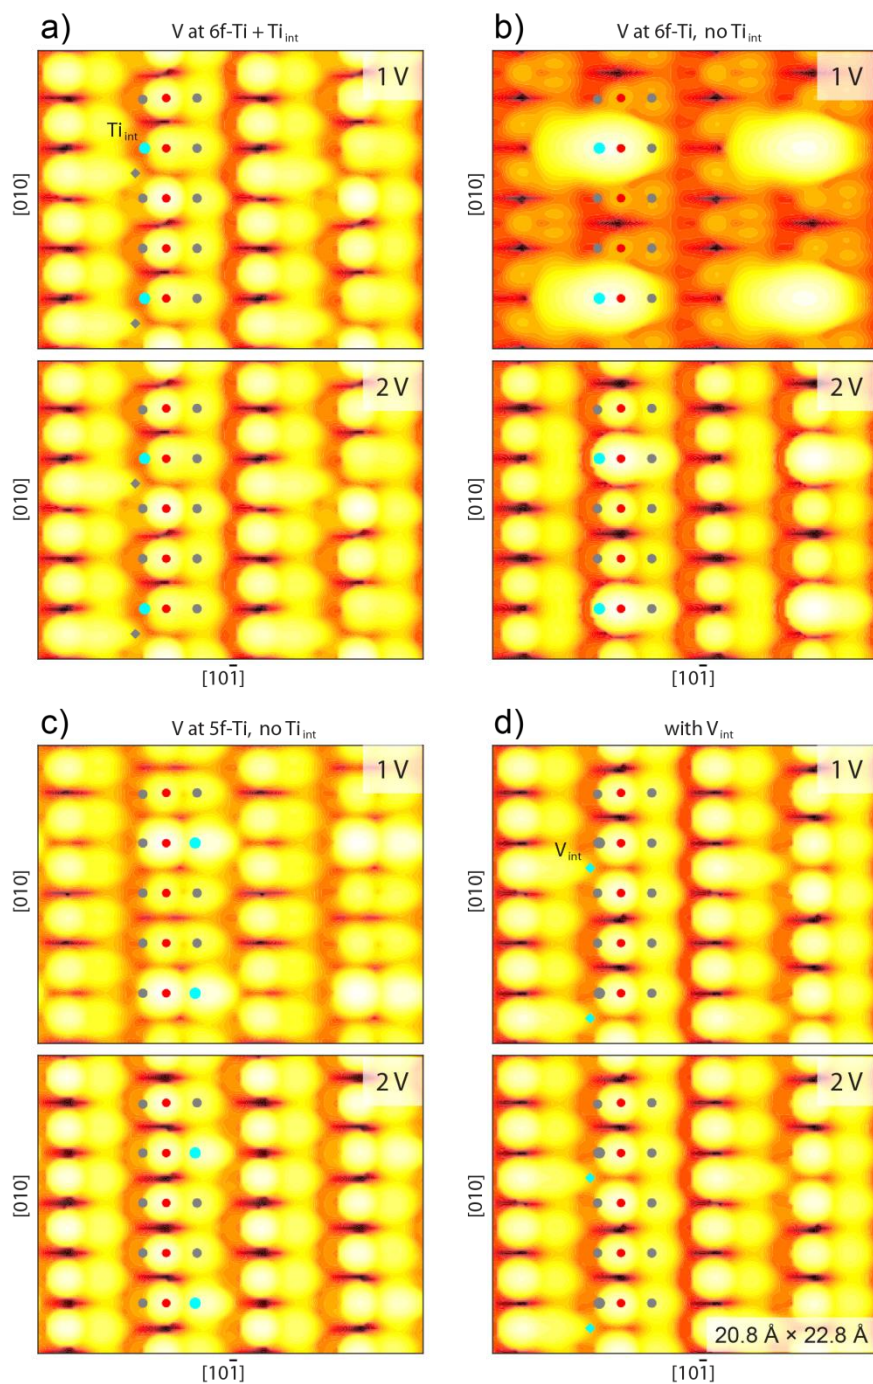

**Figure S2.** Simulated STM images of several structures of embedded V for scanning voltages of 1V and 2V. a) Structure 1 (see Table 1) with monomeric V at 6f-Ti and the Ti at an interstitial site ( $\text{Ti}_{\text{int}}$ ). b) As structure 1 but without a  $\text{Ti}_{\text{int}}$ . c) As structure 2 with V at 5f-Ti but without a  $\text{Ti}_{\text{int}}$ . d) Stoichiometric surface and V at an interstitial site. The following positions are indicated: 6f-Ti and 5f-Ti sites (grey circles), embedded V (blue circles), 2f-O (red circles),  $\text{Ti}_{\text{int}}$  (grey diamonds), and  $\text{V}_{\text{int}}$  (blue diamonds).

STM simulations of stoichiometric  $\alpha\text{-TiO}_2(101)$

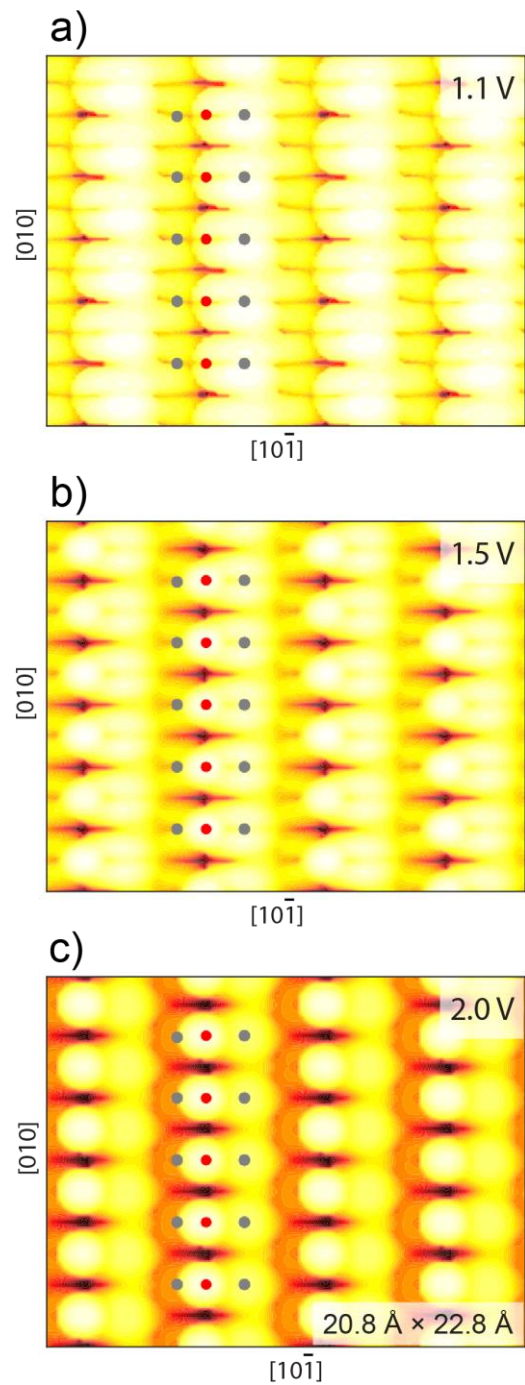

**Figure S3.** Simulated STM images of stoichiometric  $\text{TiO}_2(101)$  for various voltages. a) 1.1V, b) 1.5 V, c) 2.0 V. 6f-Ti, 5f-Ti sites (grey circles) and 2f-O (red circles) are indicated. The Tersoff–Hamann approximation<sup>2</sup> was used to conduct the STM simulations.

To calculate the Bader charges of relevant models we have used the method of Henkelman *et al.*<sup>3</sup> Table S1 summarizes the calculated Bader charges and magnetic moments of structures 1, 2 and 5 listed in Table 1 in the main article. The V atom in structure 5 shows higher values of the Bader charge and the magnetic moment than structures 1 and 2, respectively. This indicates a more reduced state of structure 5 compared to structures 1 and 2. For reference, the Bader charge of a Ti atom in the uppermost layer of an a-TiO<sub>2</sub>(101) surface is calculated to be ~19.9 e<sup>-</sup>, and that of V in the uppermost layer of V<sub>2</sub>O<sub>5</sub>(001) ~21.1 e<sup>-</sup>.

| Structure | Bader charge (e <sup>-</sup> ) |                   | Magnetic moment (μ <sub>B</sub> ) |                   |
|-----------|--------------------------------|-------------------|-----------------------------------|-------------------|
|           | V                              | Ti <sub>int</sub> | V                                 | Ti <sub>int</sub> |
| 1         | 21.26                          | 20.04             | 1.76                              | 0.03              |
| 2         | 21.27                          | 20.02             | 1.84                              | 0.01              |
| 5         | 21.57                          |                   | 2.46                              |                   |

Table S1. Calculated Bader charges and magnetic moments of structures 1, 2 and 5 (see Table 1 of the main article for assignments of the structures).

## References:

- 1 ISA, Centre for Storage Ring Facilities, Aarhus, <http://www.isa.au.dk/>.
- 2 J. Tersoff and D. R. Hamann, *Phys. Rev. B* 1985, **31**, 805–813.
- 3 G. Henkelman, A. Arnaldsson and H. Jonsson, *Comp. Mater. Sci.* 2006, **36**, 354–360.
